# Supplementary material
Source: PubMed Central journal article supplement (PMC3181379)

**A**

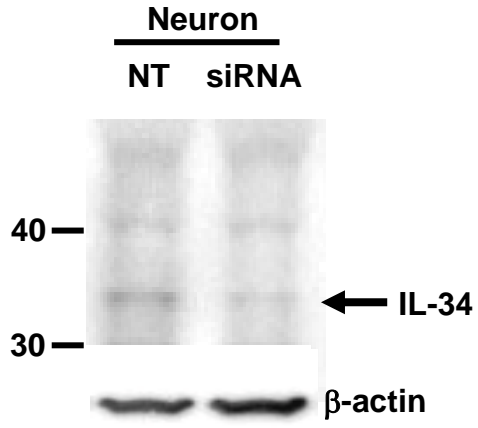

**B**

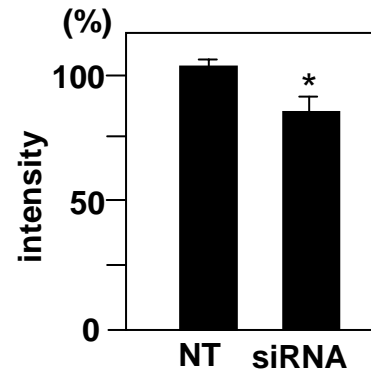

Supplement: mmc1.pdf [file mmc1.pdf]

**A**

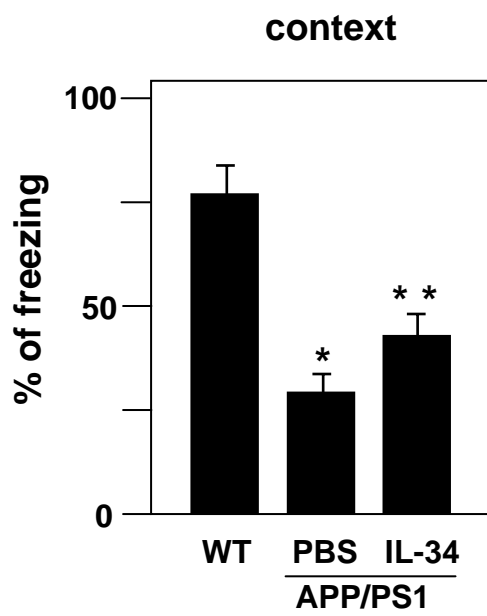

**B**

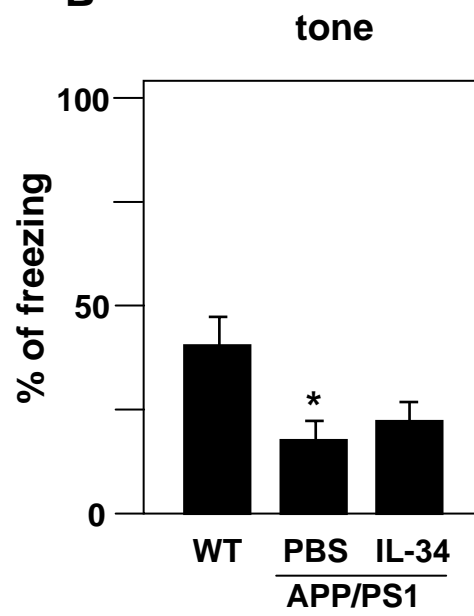

Supplement: mmc2.pdf [file mmc2.pdf]
